# Supplementary material for: Impact of Total Neoadjuvant Therapy vs. Standard Chemoradiotherapy in Locally Advanced Rectal Cancer: A Systematic Review and Meta-Analysis of Randomized Trials
Source: PubMed Central journal article supplement (PMC7762140; doi:10.3390/cancers12123655), 2020-12-05
Supplement: cancers-12-03655-s001.pdf [file cancers-12-03655-s001.pdf]

*Supplementary Materials*

# **Impact of Total Neoadjuvant Therapy vs Standard Chemoradiotherapy in Locally Advanced Rectal Cancer: A Systematic Review and Meta-Analysis of Randomized Trials**

**Maria C. Riesco-Martinez, Carlos Fernandez-Martos, Cristina Gravalos-Castro, Paula Espinosa-Olarte Paula, Anna La Salvia, Luis Robles-Diaz, Andrea Modrego-Sanchez, Rocio Garcia-Carbonero**

**Text S1. Search Strategy.**

#1 rectal cancer [Mesh]  
#2 rectal cancer [All fields]  
#3 rectal neoplasm [All fields]  
#4 #1OR #2 OR #3  
#5 chemoradiotherapy [Mesh]  
#6 chemoradiotherapy [All fields]  
#7 chemoradiation [All fields]  
#8 radiotherapy [Mesh]  
#9 radiotherapy [All fields]  
#10 neoadjuvant therapy [Mesh]  
#11 neoadjuvant treatment [All fields]  
#12 induction therapy [All fields]  
#13 total neoadjuvant [All fields]  
#14 chemotherapy [Mesh]  
#15 chemotherapy [All fields]  
#16 neoadjuvant chemotherapy [All fields]  
#17 #5 OR #6 OR #7 OR #8 OR #9 OR #10 OR #11 OR #12 OR #13 OR #14 OR #15 OR #16  
#18 randomized controlled trial [Mesh]  
#19 randomized [All fields]  
#20 controlled [All fields]  
#21 #18 OR #19 OR #20  
#22 #4 AND #17  
#23 #22 AND #21

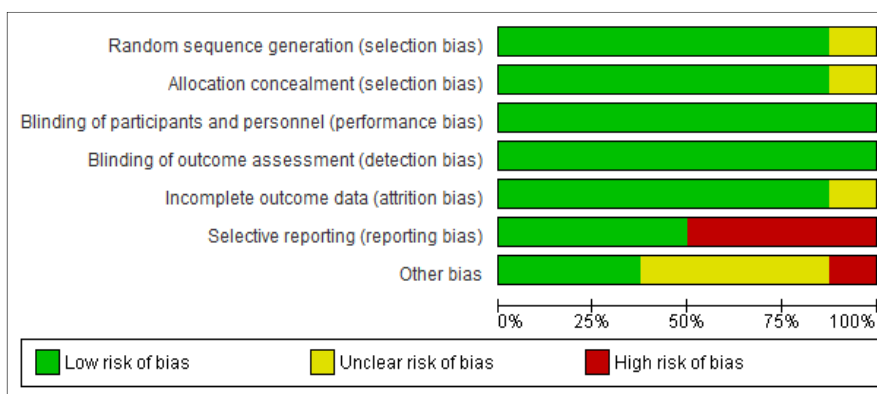

Figure S1. Risk of bias summary of included trials organized by domain.

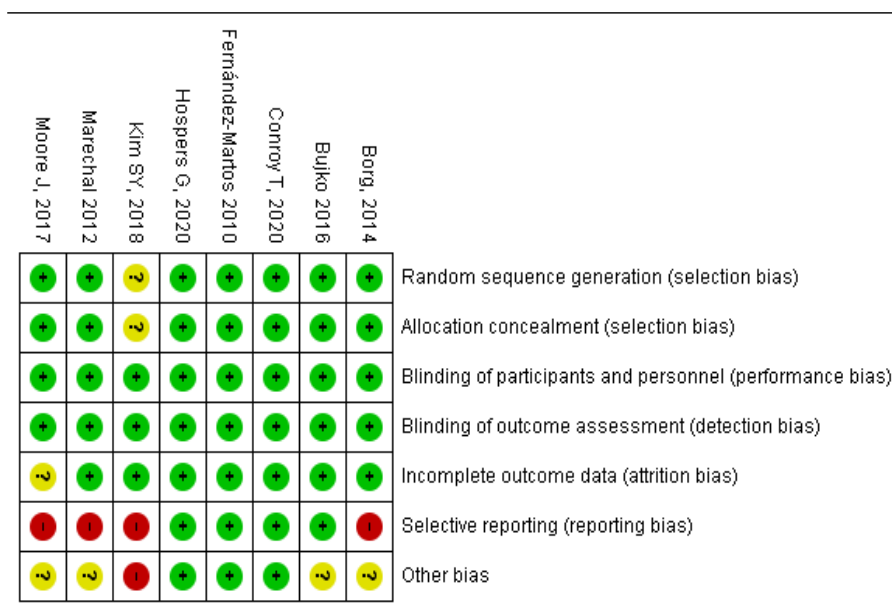

Figure S2. Risk of bias summary of included trials organized by study.

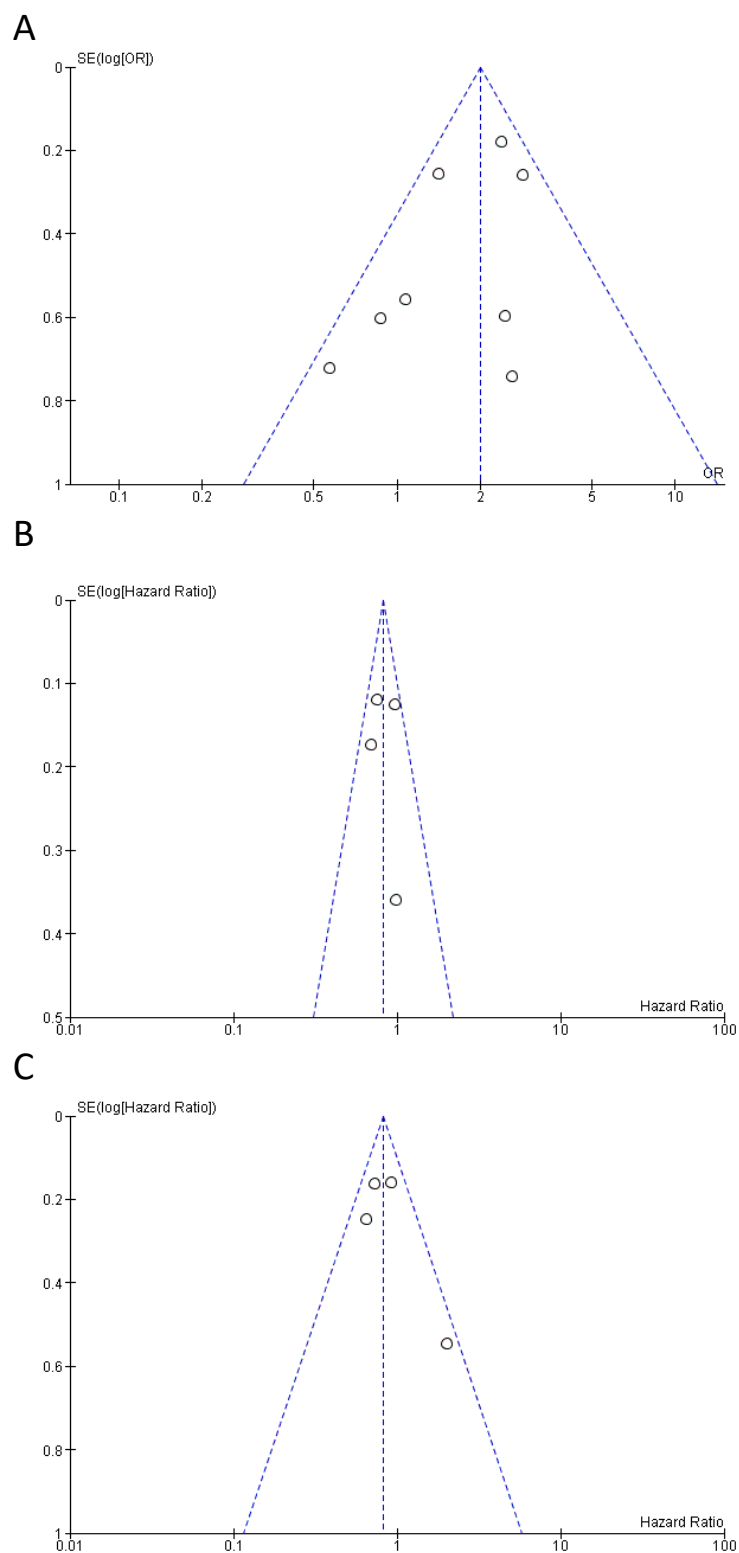

**Figure S3.** Funnel plots analysis of publication bias for (A) pathological complete response; (B) 3-year disease free survival; (C) 3-year overall survival.

A

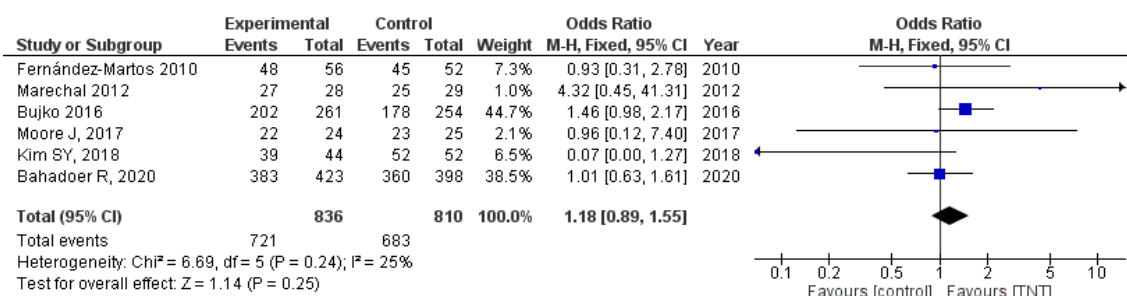

B

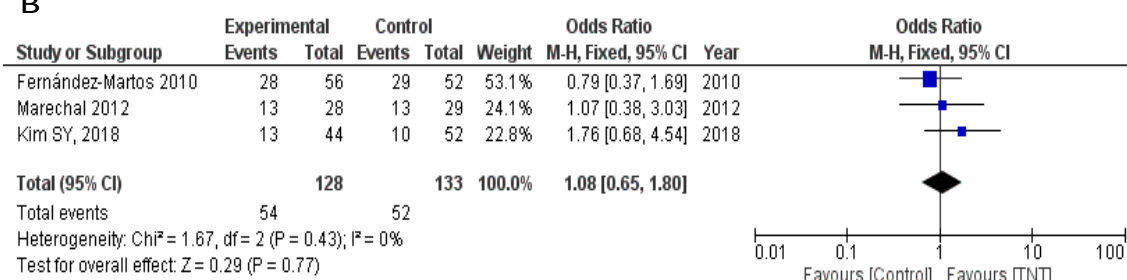

**Figure S4.** (A) Forest plot for R0 resection rate of TNT vs. standard neoadjuvant CRT. (B) Forest plot for tumor regression grade 3-4 rate of TNT vs. standard neoadjuvant CRT.

**Table S1.** Surgical Outcomes.

| Study                                | n   | Arm      | Type of Surgery |                             |              |         | Post-Operative Mortality<br>n (%) | p    |
|--------------------------------------|-----|----------|-----------------|-----------------------------|--------------|---------|-----------------------------------|------|
|                                      |     |          | None<br>n (%)   | Anterior Resection<br>n (%) | APR<br>n (%) | Missing |                                   |      |
| <i>Fernandez-Martos C</i><br>(GCR-3) | 108 | Std: 52  | 6 (11)          | 29 (56)                     | 17 (33)      | 0 (0)   | 3 (7)                             | ns   |
|                                      |     | Exp:56   | 2 (4)           | 27 (48)                     | 23 (40)      | 2 (4)   | 0 (0)                             |      |
| <i>Marechal R</i>                    | 57  | Std: 29  | 1 (3)           | 23 (79)                     | 24 (86)      | -       | NR                                |      |
|                                      |     | Exp:28   | 1 (4)           | 5 (17)                      | 3 (11)       |         |                                   |      |
| <i>Borg C</i><br>(INOVA)             | 91  | Std: 45  |                 | NR                          |              |         | 0(0)                              | ns   |
|                                      |     | Exp:46   |                 |                             |              |         | 0(0)                              |      |
| <i>Bujko K</i>                       | 515 | Std: 254 | 49              | 100 (49)                    | 83           | -       | 4 (2)                             | ns   |
|                                      |     | Exp:261  | 41              | 110 (50)                    | 82           |         | 0(0)                              |      |
| <i>Moore J</i><br>(WAIT)             | 49  | Std: 24  | 0 (0)           | 12(50)                      | 12 (50)      | -       | 0(0)                              | ns   |
|                                      |     | Exp: 25  | 0 (0)           | 18 (72)                     | 7 (28)       |         | 0(0)                              |      |
| <i>Kim SY</i>                        | 108 | Std:55   | -               | 46 (88.5)                   | 0 (0.0)      | -       | 0(0)                              | ns   |
|                                      |     | Exp:53   |                 | 34 (77.3)                   | 3 (6.8)      |         | 0(0)                              |      |
| <i>Conroy T</i><br>(PRODIGE23)       | 461 | Std:230  |                 | NR                          |              | -       | 6(2.8)                            | 0.03 |
|                                      |     | Exp:231  |                 |                             |              |         | 0(0)                              |      |
| <i>Badahoer R</i><br>(RAPIDO)        | 912 | Std:450  | 2 (0.5)         | 33 (8.3)                    | 157 (39.3)   | -       | NR                                |      |
|                                      |     | Exp:462  | 3 (0.7)         | 40 (9.4)                    | 147 (34.5)   |         |                                   |      |

APR: abdominoperineal resection; Exp: experimental arm; n: number of patients; NR: not reported; ns: not significant; std: standard arm.

**Table S2.** Sensitivity analysis for pathological complete response.

| Study Excluded     | Fixed Effect |           | I <sup>2</sup> (%) | I <sup>2</sup> - p Value |
|--------------------|--------------|-----------|--------------------|--------------------------|
|                    | OR           | 95% CI    |                    |                          |
| Fernandez-Martos C | 2.04         | 1.62–2.57 | 38                 | 0.14                     |
| Marechal           | 2.05         | 1.63–2.58 | 34                 | 0.17                     |
| Borg               | 1.97         | 1.57–2.48 | 45                 | 0.09                     |
| Bujko              | 2.17         | 1.68–2.79 | 31                 | 0.19                     |
| Moore              | 2.06         | 1.64–2.59 | 24                 | 0.24                     |
| Kim SY             | 1.98         | 1.57–2.48 | 45                 | 0.09                     |
| Conroy T           | 1.82         | 1.41–2.34 | 30                 | 0.20                     |
| Bahadoer R         | 1.75         | 1.30–2.35 | 35                 | 0.16                     |

CI: confidence interval; I<sup>2</sup>: ; OR: Odds Ratio.

**Table S3.** Sensitivity analysis for pathological complete response in trials using induction chemotherapy.

| Study Excluded     | Fixed Effect |           | I <sup>2</sup> (%) | I <sup>2</sup> - p Value |
|--------------------|--------------|-----------|--------------------|--------------------------|
|                    | OR           | 95% CI    |                    |                          |
| Fernández-Martos C | 2.37         | 1.54–3.63 | 38                 | 0.20                     |
| Marechal M         | 2.39         | 1.57–3.66 | 20                 | 0.29                     |
| Borg C             | 2.10         | 1.38–3.20 | 59                 | 0.09                     |
| Conroy T           | 1.32         | 0.69–2.53 | 0                  | 0.44                     |

CI: confidence interval; I<sup>2</sup>: ; OR: Odds Ratio.

**Table S4.** Sensitivity analysis for pathological complete response in trials using consolidation chemotherapy.

| Study Excluded | Fixed Effect |           | I <sup>2</sup> (%) | I <sup>2</sup> - p Value |
|----------------|--------------|-----------|--------------------|--------------------------|
|                | OR           | 95% CI    |                    |                          |
| Bujko K        | 2.19         | 1.58–3.05 | 46                 | 0.16                     |
| Moore J        | 2.02         | 1.53–2.68 | 32                 | 0.23                     |
| Kim SY         | 1.90         | 1.44–2.51 | 65                 | 0.06                     |
| Bahadoer R     | 1.36         | 0.87–2.12 | 9                  | 0.33                     |

CI: confidence interval; I<sup>2</sup>; OR: Odds Ratio.

**Table S5.** Sensitivity analysis for pathological complete response in trials using long-course chemoradiotherapy.

| Study Excluded     | Fixed Effect |           | I <sup>2</sup> (%) | I <sup>2</sup> - p Value |
|--------------------|--------------|-----------|--------------------|--------------------------|
|                    | OR           | 95% CI    |                    |                          |
| Fernández-Martos C | 2.12         | 1.44–3.14 | 41                 | 0.15                     |
| Marechal R         | 2.15         | 1.46–3.16 | 35                 | 0.19                     |
| Borg C             | 1.92         | 1.31–2.82 | 50                 | 0.09                     |
| Moore J            | 2.16         | 1.48–3.17 | 20                 | 0.29                     |
| Kim SY             | 1.93         | 1.32–2.82 | 50                 | 0.09                     |
| Conroy T           | 1.28         | 0.75–2.20 | 0                  | 0.43                     |

CI: confidence interval; I<sup>2</sup>; OR: Odds Ratio.

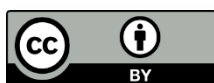

© 2020 by the authors. Licensee MDPI, Basel, Switzerland. This article is an open access article distributed under the terms and conditions of the Creative Commons Attribution (CC BY) license (<http://creativecommons.org/licenses/by/4.0/>).
